# Supplementary material
Source: PubMed Central journal article supplement (PMC5578452)
Supplement: NIHMS559590-supplement-1.pdf [file NIHMS559590-supplement-1.pdf]

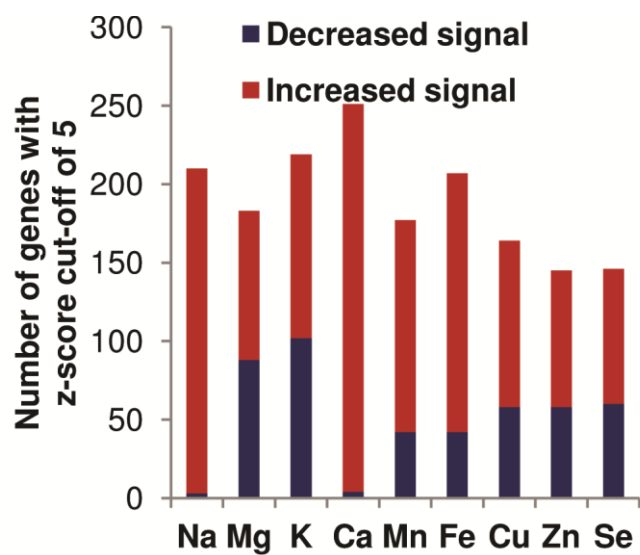

**Supplementary Figure 1.** Overview of the effect of siRNA on the elemental content of HeLa cells. A total number of genes showing significant increase (red) and decrease (blue) for each element is shown. Changes with standard scores (z-scores, derived from 3 replicates) above 5 were considered significant.

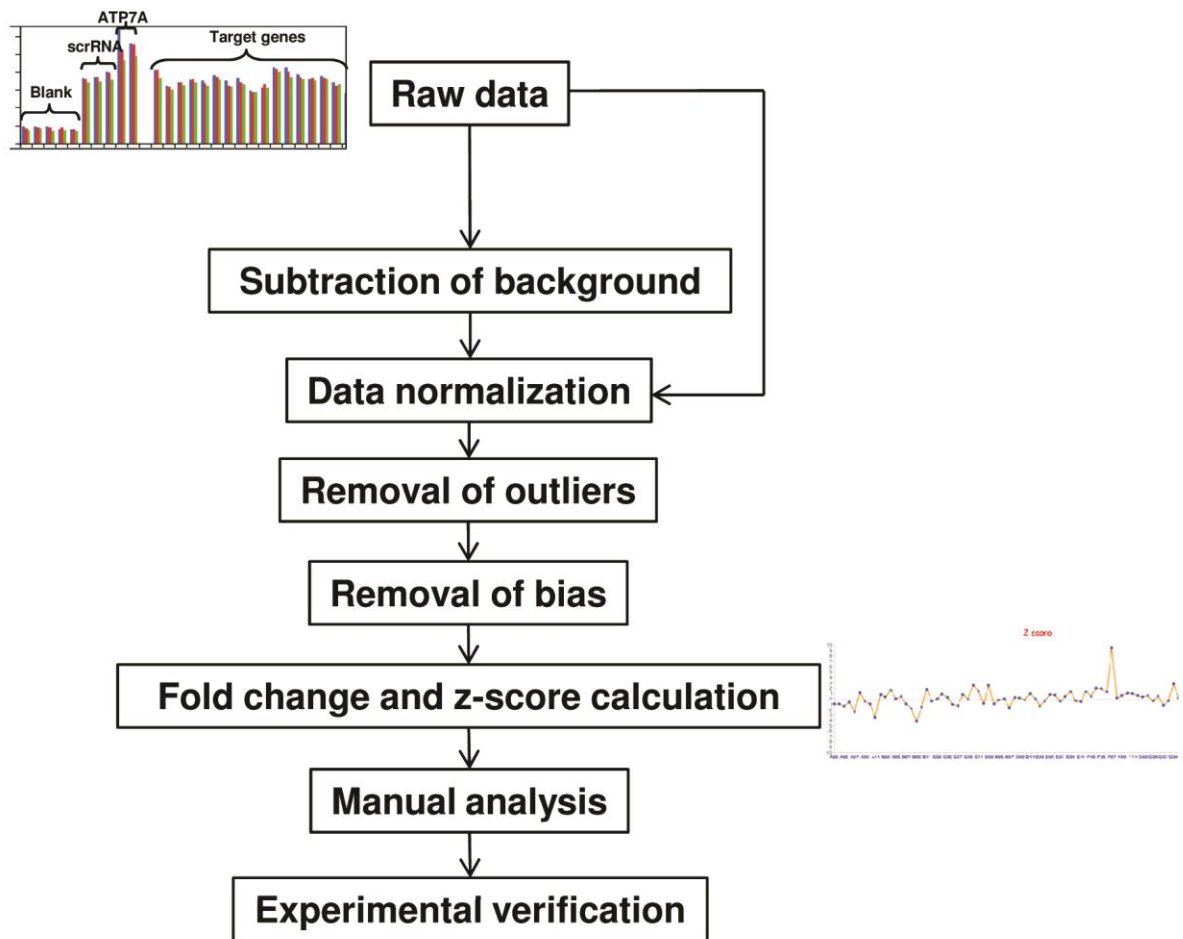

**Supplementary Figure 2.** An algorithm for processing the ionomics data. The ICP-MS data from the ionomics screen in HeLa cells was processed to remove bias. For each gene knockdown and element, we calculated standard scores (z-scores) and fold change. These data were further used for functional analysis.

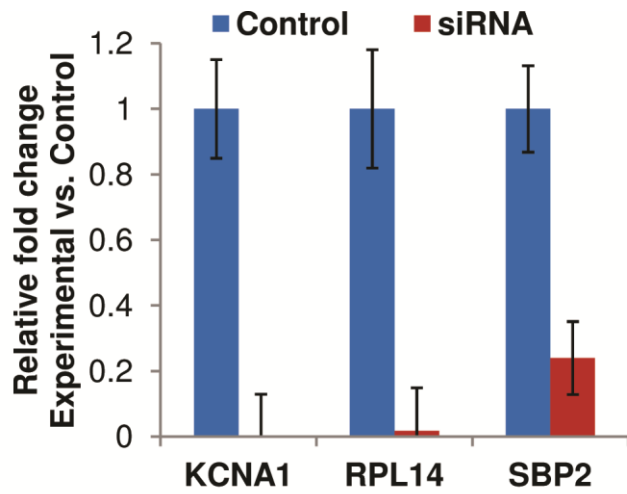

**Supplementary Figure 3.** Efficiency of siRNA knockdown analyzed by real-time PCR. KCNA1, RPL14 and SBP2 were identified in the screen and validated using  $^{75}\text{Se}$  labeling in HeLa cells (derived from 3 replicates). Total RNA from HeLa cells transfected with the corresponding siRNAs was used for real-time PCR analyses. scrRNA transfection was used as control. This figure shows gene expression changes normalized to control. One fold of standard variances for each bar were showed above.

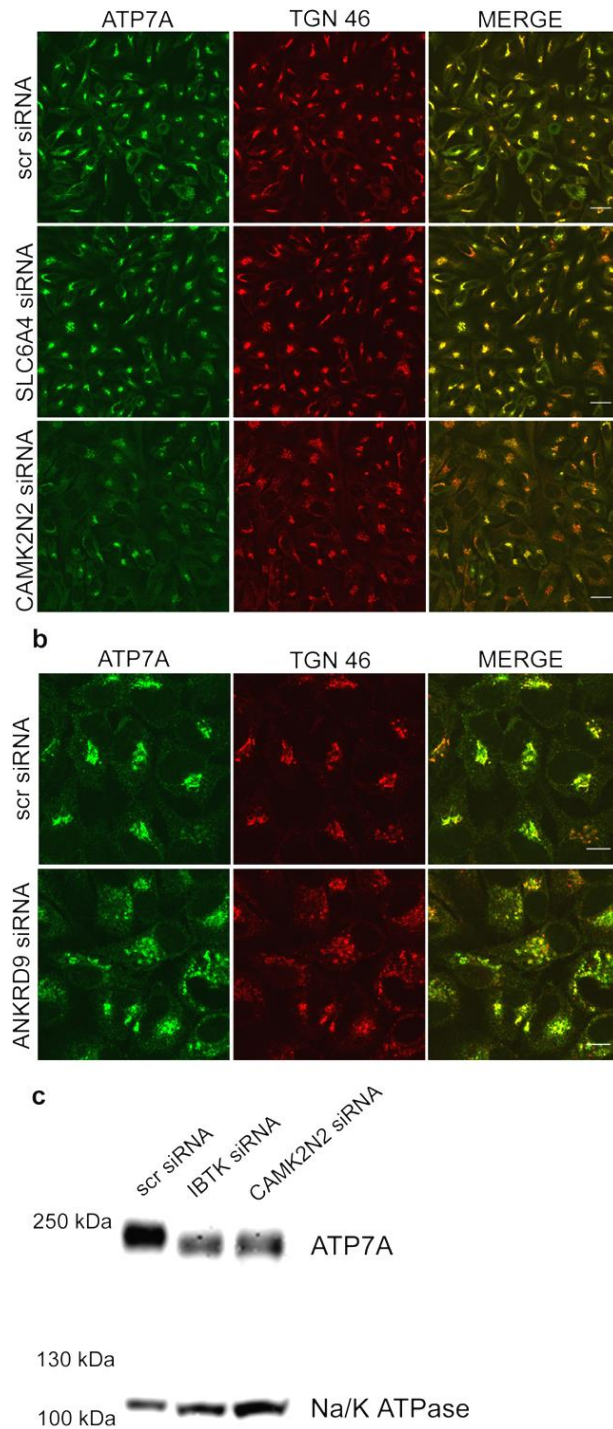

**Supplementary Figure 4.** Characterization of genes that affect copper levels in HeLa cells. Following gene-specific knockdowns, HeLa cells were fixed and analyzed by confocal microscopy with antibodies against ATP7A (green) and the trans-Golgi network marker TGN46 (red). Scale bar: 25  $\mu$ m. (b) 100x magnification images. ANKRD9 knockdown results in fragmented TGN and fragmented ATP7A staining pattern. Scale bar: 10  $\mu$ m. (c) HeLa cells were transiently transfected with siRNAs, and cell lysates were analyzed by Western blotting. A representative blot is shown. A full blot is in Supplementary Figure 7.

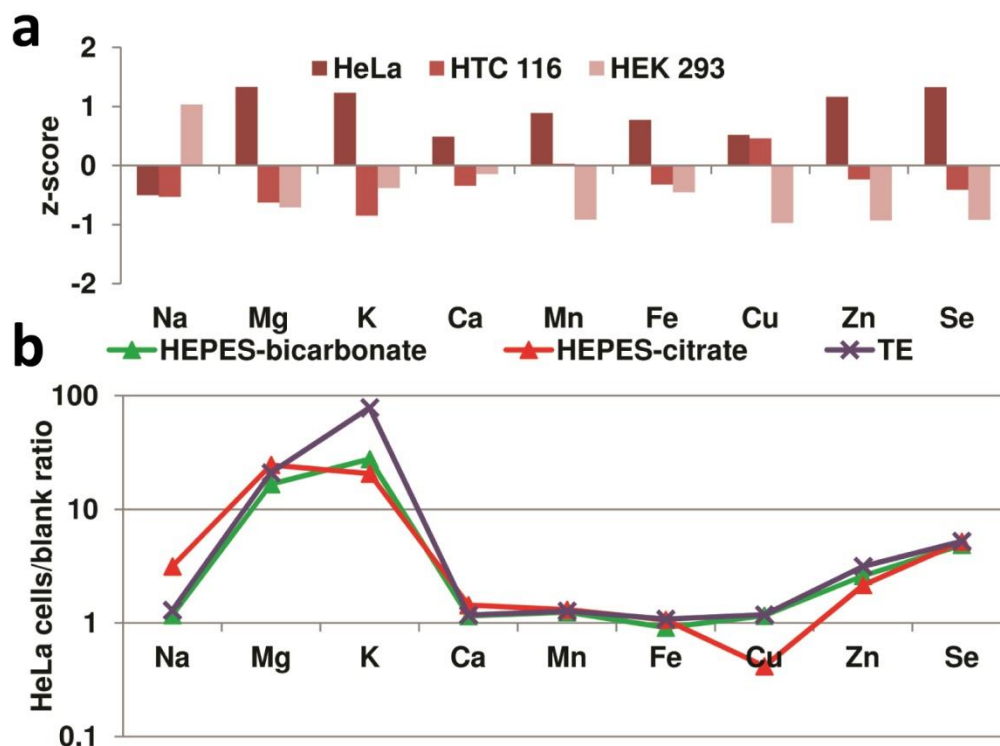

**Supplementary Figure 5.** Assay development for high-throughput ionomics screening of human cells. (a) Standard score (derived from 3 replicates) for elemental ICP-MS profile of indicated human cell lines. Cells were grown to full confluence on 6-well plates in 10% serum-supplemented DMEM. Cells were washed 3 times in TE (10 mM Tris, 1mM EDTA, pH 7.4), followed by digestions with 1.5% nitric acid and 1.5 % hydrogen peroxide (50 ppb gallium was also added as an internal standard). Trace elements were analyzed by ICP-MS. The graph represents the number of standard deviations from the mean (z-score). (b) Optimization of medium removal. HeLa cells were washed 3 times with HEPES-bicarbonate, HEPES-citrate, or TRIS-EDTA (TE), all at pH 7.4, digested and analyzed by ICP-MS.

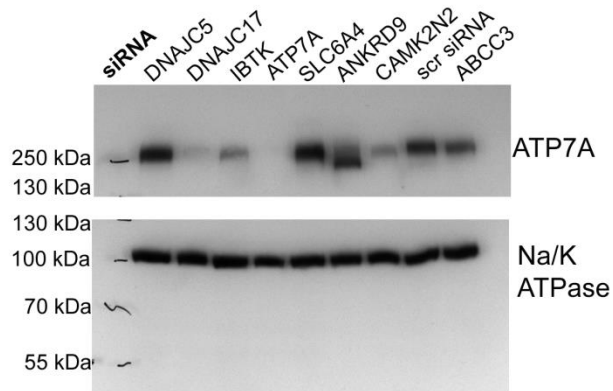

**Supplementary Figure 6.** Effect of target down-regulation on ATP7A protein levels and electrophoretic mobility. Following gene knockdowns, HeLa cell lysates were analyzed by Western blotting. The blot was cut at 130 kDa; the upper part was immunostained for ATP7A and the lower part was immunostained for Na/K-ATPase. This figure shows the entire blot, and Fig. 4b its reduced version.

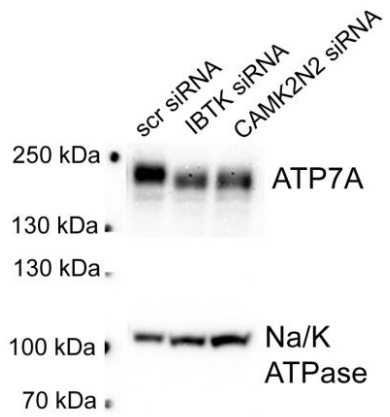

**Supplementary Figure 7.** Characterization of genes that affect copper levels in HeLa cells. HeLa cells were transiently transfected with siRNAs, and cell lysates were analyzed by Western blotting. This is a full blot that accompanies Supplementary Figure 4c.

**Supplementary Table 1. Biological processes associated with changes in iron levels.** The table was generated using Gene Ontology analysis (Genesifter, Geospiza) for the set of genes down-regulation of which increased or decreased iron levels in cells with a z-score > 3. Increased iron levels are linked to more specific biologic processes, whereas iron depletion is linked to more global changes in cell.

| DOWN-REGULATED BIOLOGICAL PROCESSES                    |             |                                                    |             |
|--------------------------------------------------------|-------------|----------------------------------------------------|-------------|
| Associated with iron elevation                         |             | Associated with iron loss                          |             |
| Ontology                                               | Genes total | Ontology                                           | Genes total |
| Generation of precursor metabolite and energy          | 29          | Cellular component organization or biogenesis      | 134         |
| Sensory perception of mechanical stimulus              | 9           | Cellular component organization                    | 131         |
| Sensory perception of sound                            | 9           | Establishment of localization                      | 126         |
| Regulation of G1/S transition of mitotic cell cycle    | 8           | transport                                          | 122         |
| G1/S transition check pooint                           | 7           | Organ development                                  | 71          |
| Mitochondrial transport                                | 7           | Organelle organization                             | 71          |
| Mitotic Cell Cycle G1/S transition checkpoint          | 7           | Cellular localization                              | 64          |
| Regulation of cyclin-dependent protein kinase activity | 7           | Establishment of localization in cell              | 63          |
| Ribonucleoprotein complex assembly                     | 7           | Cell cycle                                         | 57          |
| Cellular response to glucagon stimulus                 | 6           | Apoptosis                                          | 54          |
| Chloride transport                                     | 6           | Programmed cell death                              | 54          |
| Positive regulation of cell cycle arrest               | 6           | Regulation of multicellular organismal process     | 52          |
| Positive regulation of JUN kinase activity             | 6           | Cell cycle progress                                | 44          |
| Regulation of JUN kinase activity                      | 6           | Cell cycle phase                                   | 41          |
| Response to glucagon stimuus                           | 6           | Vesicle-mediated transport                         | 40          |
| Protein heterotetramerization                          | 5           | Mitotic cell cycle                                 | 35          |
| Activation of JUN kinase                               | 4           | M phase                                            | 34          |
| Embryonic forelimb morphogenesis                       | 4           | Cytoskeleton organization                          | 33          |
| Forelimb morphogenesis                                 | 4           | Secretion                                          | 31          |
| G1 phase of mitotic cell cycle                         | 4           | Regulation of multicellular organismal development | 30          |
| Histone ubiquitination                                 | 4           | Cell division                                      | 29          |
| Maintenance of protein localization to organelle       | 4           | Cellular component movement                        | 27          |
| Nerve development                                      | 4           | Organelle fission                                  | 26          |
| Neural crest cell development                          | 4           | Cell motility                                      | 26          |
| Neural crest cell differentiation                      | 4           | Cellular membrane organization                     | 26          |
| Neural crest cell migration                            | 4           | M phase of mitotic cell cycle                      | 26          |
| Organic cation transport                               | 4           | Mitosis                                            | 26          |
| Regulation of mRNA stability                           | 4           | Nuclear division                                   | 25          |
| Regulation of RNA stability                            | 4           | Response to abiotic stimulus                       | 24          |
| Response to antibiotic                                 | 4           | Cardiovascular system development                  | 24          |
| T cell mediated immunity                               | 4           | Cell migration                                     | 24          |
| Activation of caspase by cytochrome C                  | 3           | Circulatory system development                     | 24          |
| Axon cargo transport                                   | 3           | Secretion by cell                                  | 23          |
| Cellular respose to radiation                          | 3           | Microtubule based process                          | 21          |
| Copulation                                             | 3           | Cellular amine metabolic process                   | 18          |
| DNA integration                                        | 3           | Microtubule cytoskeleton organization              | 17          |
| DNA ligation                                           | 3           | Regulation of system process                       | 15          |
| Endothelial cell differentiation                       | 3           | Heart development                                  | 15          |



|                                                                          |   |                                                |    |
|--------------------------------------------------------------------------|---|------------------------------------------------|----|
| Glutamine metabolic process                                              | 3 | Positive regulation of protein metabolism      | 15 |
| Maintenance of protein localization to nucleus                           | 3 | Tissue morphogenesis                           | 14 |
| Negative regulation of cytokine biosynthesis                             | 3 | Chromosome segregation                         | 14 |
| Nucleotide excision repair, DNA gap filling                              | 3 | Positive regulation of multicellular process   | 13 |
| Outflow tract morphogenesis                                              | 3 | Golgi vesicle transport                        | 13 |
| Quaternary ammonium group transport                                      | 3 | Positive regulation of protein modification    | 12 |
| Response to vitamin D                                                    | 3 | Muscle tissue development                      | 12 |
| Steroid catabolic process                                                | 3 | Organelle localization                         | 12 |
| Thymus development                                                       | 3 | Establishment of organelle localization        | 12 |
| Androgen biosynthetic process                                            | 2 | Protein oligomerization                        | 11 |
| Anterograde axon cargo transport                                         | 2 | Striatal muscle tissue development             | 11 |
| Apoptotic cell clearance                                                 | 2 | Spindle organization                           | 10 |
| Asparagine metabolic process                                             | 2 | Proteasomal ubiquitin-dependent catabolism     | 10 |
| Assembly of spliceosomal tri-snRNP                                       | 2 | Mitotic prometaphase                           | 9  |
| Betaine transport                                                        | 2 | Rho protein signal transduction                | 9  |
| Carnitine transport                                                      | 2 | Heart morphogenesis                            | 8  |
| Cholesterol import                                                       | 2 | Meiotic cell cycle                             | 8  |
| Cholesterol storage                                                      | 2 | Mitotic spindle organization                   | 8  |
| Diacylglycerol metabolic process                                         | 2 | Positive regulation of phosphate metabolism    | 8  |
| Dicotomous subdivision of an epithelial terminal unit                    | 2 | Positive regulation of phosphorus metabolism   | 8  |
| DNA ligation involved in DNA repair                                      | 2 | Positive regulation of phosphorylation         | 8  |
| Enteric nervous system development                                       | 2 | Positive regulation of protein phosphorylation | 8  |
| Establishment of mitotic spindle localization                            | 2 | Striatal muscle cell development               | 8  |
| Establishment of mitotic spindle orientation                             | 2 | Vesicle localization                           | 8  |
| Establishment of spindle localization                                    | 2 | Vesicle organization                           | 8  |
| Establishment of spindle orientation                                     | 2 | Body fluid secretion                           | 7  |
| I-kappaB phosphorylation                                                 | 2 | Camera-type eye development                    | 7  |
| Induction of apoptosis by oxidative stress                               | 2 | Cellular component assembly in morphogenesis   | 7  |
| Mannose metabolic process                                                | 2 | Establishment of vesicle localization          | 7  |
| Meiotic chromosome segregation                                           | 2 | Heart contraction                              | 7  |
| Mitochondrial respiratory chain complex 1 assembly                       | 2 | Membrane budding                               | 7  |
| Muscarinic acetylcholine receptor signaling                              | 2 | Muscle fiber development                       | 7  |
| NADH dehydrogenase complex assembly                                      | 2 | Cardiac muscle tissue development              | 6  |
| Negative regulation of macrophage derived from foam cell differentiation | 2 | Positive regulation of protein ubiquitination  | 6  |
| Neurotransmitter catabolic process                                       | 2 | Protein heterooligomerization                  | 6  |
| Optic nerve development                                                  | 2 | Regulation of action potential                 | 6  |
| Positive regulation of fatty acid biosynthesis                           | 2 | Regulation of cellular amine metabolism        | 6  |
| Pre-microRNA processing                                                  | 2 | Response to hexose stimulus                    | 6  |
| Production of miRNA involved in gene silencing                           | 2 | Response to monosaccharide stimulus            | 6  |
| Protein destabilization                                                  | 2 | Retrograde vesicle transport. Golgi to ER      | 6  |
| Protein homotrimerization                                                | 2 | Cardiac muscle contraction                     | 5  |
| Regulation of appetite                                                   | 2 | Cardiac muscle tissue morphogenesis            | 5  |
| Regulation of cholesterol efflux                                         | 2 | Catechol metabolism                            | 5  |
| Retinal ganglion cell axon guidance                                      | 2 | Catecholamine metabolism                       | 5  |
| Ribosomal large subunit biogenesis                                       | 2 | COPI coating of Golgi vesicle                  | 5  |
| Ribosome assembly                                                        | 2 | Diol metabolic process                         | 5  |
| Spindle localization                                                     | 2 | Golgi transport vesicle coating                | 5  |
| Sterol import                                                            | 2 | Mitotic sister chromatid segregation           | 5  |
| Sterol transmembrane transport                                           | 2 | Muscle organ morphogenesis                     | 5  |

|                           |   |                                              |   |
|---------------------------|---|----------------------------------------------|---|
| Sulfur compound transport | 2 | Muscle tissue morphogenesis                  | 5 |
| Trachea development       | 2 | Phenol-containing compound metabolism        | 5 |
| V(D)J recombination       | 2 | Response to glucose stimulus                 | 5 |
|                           |   | Response to heat                             | 5 |
|                           |   | Response to osmotic stress                   | 5 |
|                           |   | Sister chromatid segregation                 | 5 |
|                           |   | Ameboidal cell migration                     | 4 |
|                           |   | Dopamine metabolic process                   | 4 |
|                           |   | Miofibril assembly                           | 4 |
|                           |   | Patterning of blood vessels                  | 4 |
|                           |   | Peptide biosynthesis                         | 4 |
|                           |   | Pigmentation                                 | 4 |
|                           |   | Positive regulation of ERK1 and ERK2 cascade | 4 |

**Supplementary Table 2. Distribution of genes, whose knockdown increases Cu or Fe levels, according to their standard scores (z-scores, derived from 3 replicates).**

| <b>z-score</b> | <b>2</b> | <b>3</b> | <b>4</b> | <b>5</b> | <b>6</b> | <b>7</b> | <b>8</b> | <b>9</b> | <b>10</b> |
|----------------|----------|----------|----------|----------|----------|----------|----------|----------|-----------|
| Cu             | 2324     | 876      | 317      | 110      | 43       | 18       | 10       | 7        | 3         |
| Fe             | 2301     | 764      | 239      | 61       | 13       | 1        | 0        | 0        | 0         |

**Supplementary Table 3. Comparison of biological processes influencing copper and iron ionomes.**

| Copper                                                                     |                 | Iron                                                  |                 |
|----------------------------------------------------------------------------|-----------------|-------------------------------------------------------|-----------------|
| Biological Process                                                         | Number of genes | Biological Process                                    | Number of genes |
| cellular macromolecular complex subunit organization                       | 15              | reproductive process                                  | 24              |
| cellular membrane organization                                             | 13              | generation of precursor metabolites and energy        | 12              |
| endocytosis                                                                | 9               | negative regulation of cell differentiation           | 9               |
| membrane invagination                                                      | 9               | cellular component biogenesis                         | 7               |
| nuclear mRNA splicing, via spliceosome                                     | 8               | lipid localization                                    | 7               |
| RNA splicing, via transesterification reactions                            | 8               | lipid transport                                       | 7               |
| RNA splicing, via transesterification with bulged adenosine as nucleophile | 8               | ribonucleoprotein complex biogenesis                  | 7               |
| regulation of GTP catabolic process                                        | 6               | canonical Wnt receptor signaling pathway              | 5               |
| regulation of GTPase activity                                              | 6               | cellular response to extracellular stimulus           | 5               |
| cyclic-nucleotide-mediated signaling                                       | 5               | G2/M transition of mitotic cell cycle                 | 5               |
| elevation of cytosolic calcium ion concentration                           | 5               | <i>regulation of transmission of nerve impulse</i>    | 5               |
| G-protein signaling, coupled to cyclic nucleotide second messenger         | 5               | response to vitamin                                   | 5               |
| induction of apoptosis by extracellular signals                            | 5               | <i>ribonucleoprotein complex assembly</i>             | 5               |
| neuron apoptosis                                                           | 5               | <i>ribonucleoprotein complex subunit organization</i> | 5               |
| neuron death                                                               | 5               | cellular response to nutrient                         | 4               |
| regulation of neuron apoptosis                                             | 5               | cellular response to nutrient levels                  | 4               |
| regulation of synaptic transmission                                        | 5               | chloride transport                                    | 4               |
| <i>regulation of transmission of nerve impulse</i>                         | 5               | embryonic appendage morphogenesis                     | 4               |
| <i>ribonucleoprotein complex subunit organization</i>                      | 5               | embryonic limb morphogenesis                          | 4               |
| circadian rhythm                                                           | 4               | gene silencing                                        | 4               |
| <i>ribonucleoprotein complex assembly</i>                                  | 4               | inorganic anion transport                             | 4               |
| actomyosin structure organization                                          | 3               | mitochondrial transport                               | 4               |

To generate this table, gene ontology analysis was performed for all genes down-regulation of which was associated with increased copper or iron levels (z-score above 4, derived from 3 replicates). Biological processes common for copper and iron ionomes are indicated in italic. The majority of processes were unique for each ionome.

**Supplementary Table 4. Transport/trafficking proteins down-regulation of which produces copper elevation with the standard score (z-score, derived from 3 replicates) > 4.** Blue color indicates protein with known/predicted roles in intracellular protein or vesicle trafficking. The Table was generated using GeneSifter.

| <b>z-score</b> | <b>Gene Identifier</b> | <b>Gene Name</b>                                                |
|----------------|------------------------|-----------------------------------------------------------------|
| 14.247         | NM_004886              | Amyloid beta (A4) precursor protein-binding, family A, member 3 |
| 10.242         | NM_007332              | Transient receptor potential channel, subfamily A, member 1     |
| 9.493          | NM_000052              | ATPase, Cu <sup>++</sup> transporting, alpha polypeptide        |
| 6.744          | NM_015525              | Inhibitor of Bruton agammaglobulinemia tyrosine kinase          |
| 6.512          | NM_015064              | ELKS/RAB6-interacting/CAST family member 1                      |
| 6.215          | NM_002269              | Karyopherin alpha 5 (importin alpha 6)                          |
| 5.978          | NM_173160              | FXYD domain containing ion transport regulator 4                |
| 5.848          | NM_002674              | Pro-melanin-concentrating hormone                               |
| 5.658          | NM_198822              | ATP5L2                                                          |
| 5.6            | NM_003786              | ATP-binding cassette, sub-family C (CFTR/MRP), member 3         |
| 5.481          | NM_152701              | ATP-binding cassette, sub-family A (ABC1), member 13            |
| 5.429          | NM_004547              | NADH dehydrogenase (ubiquinone) 1 beta subcomplex, 4, 15kDa     |
| 5.308          | NM_020845              | Phosphatidylinositol transfer protein, membrane-associated 2    |
| 5.216          | NM_021168              | RAB40C, member RAS oncogene family                              |
| 5.203          | NM_016112              | Polycystic kidney disease 2-like 1                              |
| 5.2            | NM_014770              | ArfGAP with GTPase domain, ankyrin repeat and PH domain 2       |
| 5.125          | NM_001680              | FXYD domain containing ion transport regulator 2                |
| 5.095          | NM_001128              | Adaptor-related protein complex 1, gamma 1 subunit              |
| 5.003          | NM_001834              | Clathrin, light chain (Lcb)                                     |
| 4.948          | NM_016224              | Sorting nexin 9                                                 |
| 4.932          | NM_005959              | Melatonin receptor 1B                                           |
| 4.923          | NM_018384              | GTPase, IMAP family member 5                                    |
| 4.883          | NM_006827              | Transmembrane emp24-like trafficking protein 10 (yeast)         |
| 4.808          | NM_018977              | Neurologin 3                                                    |
| 4.721          | NM_003027              | SH3-domain GRB2-like 3                                          |
| 4.708          | NM_004045              | ATX1 antioxidant protein 1 homolog (yeast)                      |
| 4.699          | NM_006395              | ATG7 autophagy related 7 homolog                                |
| 4.686          | NM_024723              | FLJ23471                                                        |
| 4.663          | NM_005856              | Receptor (G protein-coupled) activity modifying protein 3       |
| 4.522          | NM_198686              | RAB15, member RAS oncogene family                               |
| 4.437          | NM_004541              | NADH dehydrogenase (ubiquinone) 1 alpha subcomplex, 1, 7.5kDa   |
| 4.404          | NM_178450              | Membrane-associated ring finger (C3HC4) 3                       |
| 4.381          | NM_012417              | Phosphatidylinositol transfer protein, cytoplasmic 1            |
| 4.372          | NM_002564              | Purinergic receptor P2Y, G-protein coupled, 2                   |
| 4.336          | NM_173637              | Solute carrier family 25, member 41                             |
| 4.33           | NM_000830              | Glutamate receptor, ionotropic, kainate 1                       |
| 4.328          | NM_031431              | Component of oligomeric golgi complex 3                         |
| 4.326          | NM_017954              | Ca <sup>++</sup> -dependent secretion activator 2               |
| 4.305          | NM_003627              | Solute carrier family 43, member 1                              |
| 4.289          | NM_000184              | Hemoglobin, gamma G                                             |
| 4.289          | NM_016075              | Vacuolar protein sorting 36 homolog                             |
| 4.286          | NM_020783              | Synaptotagmin IV                                                |

4.28 NM\_003042 Solute carrier family 6 (neurotransmitter transporter, GABA), member 1  
4.202 NM\_004305 Bridging integrator 1  
4.165 NM\_001157 Annexin A11  
4.164 NM\_030636 Endonuclease/exonuclease/phosphatase family domain containing 1  
4.162 NM\_000841 Glutamate receptor, metabotropic 4  
4.153 NM\_001293 Chloride channel, nucleotide-sensitive, 1A  
4.138 NM\_016128 Coatomer protein complex, subunit gamma  
4.121 NM\_198991 Potassium channel tetramerisation domain containing 1  
4.056 NM\_004518 Potassium voltage-gated channel, KQT-like subfamily, member 2  
4.035 NM\_004794 RAB33A, member RAS oncogene family

**Supplementary Table 5. Biological processes associated with changes in copper levels.** The table was generated using Gene Ontology analysis (Genesifter) for the set of genes downregulation of which changes copper levels in cells with a standard score (z-score, derived from 3 replicates) above 3.

| Biological processes, downregulation of which is associated with copper elevation |             | Biological processes, downregulation of which is associated with copper loss |             |
|-----------------------------------------------------------------------------------|-------------|------------------------------------------------------------------------------|-------------|
| Ontology                                                                          | Genes total | Ontology                                                                     | Genes total |
| generation of precursor metabolites and energy                                    | 25          | macromolecule localization                                                   | 24          |
| response to inorganic substance                                                   | 17          | cellular component assembly at cellular level                                | 14          |
| lipid catabolic process                                                           | 15          | cell growth                                                                  | 6           |
| organic acid transport                                                            | 15          | maintenance of location                                                      | 6           |
| carboxylic acid transport                                                         | 14          | regulation of cell size                                                      | 6           |
| phospholipid metabolic process                                                    | 14          | maintenance of location in cell                                              | 5           |
| lipid modification                                                                | 13          | maintenance of protein location                                              | 5           |
| lipid transport                                                                   | 12          | maintenance of protein location in cell                                      | 5           |
| glycerophospholipid metabolic process                                             | 11          | response to metal ion                                                        | 5           |
| monocarboxylic acid transport                                                     | 10          | positive regulation of cell adhesion                                         | 4           |
| phospholipid biosynthetic process                                                 | 10          | protein-DNA complex assembly                                                 | 4           |
| lipoprotein metabolic process                                                     | 9           | protein-DNA complex subunit organization                                     | 4           |
| glycerophospholipid biosynthetic process                                          | 8           | receptor-mediated endocytosis                                                | 4           |
| double-strand break repair                                                        | 7           | RNA localization                                                             | 4           |
| fatty acid oxidation                                                              | 7           | establishment of RNA localization                                            | 3           |
| fatty acid transport                                                              | 7           | heart contraction                                                            | 3           |
| lipid oxidation                                                                   | 7           | heart process                                                                | 3           |
| lipoprotein biosynthetic process                                                  | 7           | homophilic cell adhesion                                                     | 3           |
| monocarboxylic acid catabolic process                                             | 7           | lipid modification                                                           | 3           |
| oxidative phosphorylation                                                         | 7           | mitotic prometaphase                                                         | 3           |
| ATP synthesis coupled electron                                                    | 6           | monovalent inorganic cation                                                  | 3           |

|                                                        |   |                                                               |   |
|--------------------------------------------------------|---|---------------------------------------------------------------|---|
| transport                                              |   | homeostasis                                                   |   |
| fatty acid catabolic process                           | 6 | negative regulation of response to external stimulus          | 3 |
| iron ion transport                                     | 6 | nucleic acid transport                                        | 3 |
| mitochondrial ATP synthesis coupled electron transport | 6 | nucleobase, nucleoside, nucleotide and nucleic acid transport | 3 |
| nucleotide-excision repair                             | 6 | regulation of heart contraction                               | 3 |
| protein lipidation                                     | 6 | regulation of inflammatory response                           | 3 |
| long-chain fatty acid transport                        | 5 | regulation of pH                                              | 3 |
| meiosis I                                              | 5 | response to calcium ion                                       | 3 |
| response to calcium ion                                | 5 | RNA transport                                                 | 3 |
| cellular potassium ion transport                       | 4 | spermatid development                                         | 3 |
| chloride transport                                     | 4 | spermatid differentiation                                     | 3 |
| heme metabolic process                                 | 4 | transition metal ion transport                                | 3 |
| histone ubiquitination                                 | 4 | chloride transport                                            | 2 |
| multicellular organismal response to stress            | 4 | filopodium assembly                                           | 2 |
| nucleobase, nucleoside and nucleotide interconversion  | 4 | inorganic anion transport                                     | 2 |
| potassium ion transmembrane transport                  | 4 | lipoprotein metabolic process                                 | 2 |
| reciprocal meiotic recombination                       | 4 | microspike assembly                                           | 2 |
| regulation of lipid catabolic process                  | 4 | response to pH                                                | 2 |
| response to dsRNA                                      | 4 | sterol biosynthetic process                                   | 2 |
| transcription-coupled nucleotide-excision repair       | 4 |                                                               |   |
| actomyosin structure organization                      | 3 |                                                               |   |
| alkene biosynthetic process                            | 3 |                                                               |   |
| CD4-positive, alpha beta T cell differentiation        | 3 |                                                               |   |
| chromosome localization                                | 3 |                                                               |   |
| copper ion transport                                   | 3 |                                                               |   |



|                                                    |   |  |  |
|----------------------------------------------------|---|--|--|
| establishment of chromosome localization           | 3 |  |  |
| fibrinolysis                                       | 3 |  |  |
| foam cell differentiation                          | 3 |  |  |
| heme biosynthetic process                          | 3 |  |  |
| icosanoid secretion                                | 3 |  |  |
| icosanoid transport                                | 3 |  |  |
| leukotriene biosynthetic process                   | 3 |  |  |
| macrophage derived foam cell differentiation       | 3 |  |  |
| myofibril assembly                                 | 3 |  |  |
| neuroprotection                                    | 3 |  |  |
| nucleoside diphosphate metabolic process           | 3 |  |  |
| parturition                                        | 3 |  |  |
| preassembly of GPI anchor in ER membrane           | 3 |  |  |
| purine-containing compound transmembrane transport | 3 |  |  |
| pyrimidine nucleotide biosynthetic process         | 3 |  |  |
| pyrimidine ribonucleotide biosynthetic process     | 3 |  |  |
| pyrimidine ribonucleotide metabolic process        | 3 |  |  |
| regulation of epidermal cell differentiation       | 3 |  |  |
| regulation of epidermis development                | 3 |  |  |
| regulation of receptor activity                    | 3 |  |  |
| response to pain                                   | 3 |  |  |
| response to purine-containing compound             | 3 |  |  |
| retrograde transport, endosome to Golgi            | 3 |  |  |

|                                                                     |   |  |  |
|---------------------------------------------------------------------|---|--|--|
| steroid hormone mediated signaling pathway                          | 3 |  |  |
| beta-amyloid metabolic process                                      | 2 |  |  |
| blastoderm segmentation                                             | 2 |  |  |
| cGMP-mediated signaling                                             | 2 |  |  |
| cholesterol storage                                                 | 2 |  |  |
| chromosome organization involved in meiosis                         | 2 |  |  |
| DNA ligation                                                        | 2 |  |  |
| dsRNA fragmentation                                                 | 2 |  |  |
| fat-soluble vitamin catabolic process                               | 2 |  |  |
| fatty acid alpha-oxidation                                          | 2 |  |  |
| female meiosis                                                      | 2 |  |  |
| gap junction assembly                                               | 2 |  |  |
| GTP biosynthetic process                                            | 2 |  |  |
| meiotic prophase I                                                  | 2 |  |  |
| myeloid dendritic cell differentiation                              | 2 |  |  |
| negative regulation of appetite                                     | 2 |  |  |
| negative regulation of cell-matrix adhesion                         | 2 |  |  |
| negative regulation of fibrinolysis                                 | 2 |  |  |
| negative regulation of macrophage derived foam cell differentiation | 2 |  |  |
| negative regulation of response to food                             | 2 |  |  |
| nucleotide phosphorylation                                          | 2 |  |  |
| pericardium development                                             | 2 |  |  |

**Supplementary Table 6. Comparison of the ICP-MS data for *Saccharomyces cerevisiae* gene deletions producing significant changes of Fe or Cu levels and their orthologs in HeLa cells.** Yeast genes producing statistically significant changes of copper or iron levels upon knockdown were selected from the database available at <http://www.ionomicshub.org/> and the fold change was calculated using normalized ICP-MS value available at the website. Human orthologs of these yeast genes were identified through Ensembl database; and the ICP-MS data for these orthologs was taken from the dataset generated in the current study. The Z-score values for yeast data are defined in Yu and colleagues <sup>21</sup>; the Z-score values for HeLa screen are as defined in the text. All the statistical results were derived from 3 replicates.

| Yeast-haploid         | Cu levels     |                   | HeLa cells          | Cu levels    |               |
|-----------------------|---------------|-------------------|---------------------|--------------|---------------|
| Protein (gene) name   | Fold change   | Moderated z-score | Protein (gene) name | Fold change  | z-score       |
| STP22 (YCL008C)       | 1.076*        | -4.219            | TSG 101             | 1.04         | 0.914         |
| CHA1 (YCL064C)        | 1.101*        | -4.702            | SDS                 | 1.016        | 0.224         |
|                       |               |                   | SDSL                | 0.979        | -0.331        |
| TUP1 (YCR084C)        | 0.266         | -5.980            | WDR5                | 1.171        | 2.785         |
| RPP2B (YDR382W)       | 0.855         | -3.589            | RPLP2               | 0.953        | -0.386        |
| SXM1(YDR395W)         | 0.793         | -4.437            | IPO7                | 1.195        | 1.685         |
|                       |               |                   | IPO8                | 0.923        | -0.997        |
| HPT1 (YDR399W)        | 0.947         | -4.813            | HPRT1               | 1.007        | 0.117         |
| <b>NPP2 (YEL016C)</b> | <b>0.826*</b> | <b>-3.435</b>     | ENPP1               | 0.958        | -0.167        |
|                       |               |                   | ENPP2               | 1.007        | 0.088         |
|                       |               |                   | ENPP3               | 1.099        | 1.200         |
|                       |               |                   | <b>ENPP6</b>        | <b>0.701</b> | <b>-3.189</b> |
| RPO41 (YFL036W)       | 0.904*        | -5.239            | POLRMT              | 1.003        | 0.119         |
| AIR1 (YIL079C)        | 1.000*        | -5.068            | ZCCHC7              | 0.972        | -0.298        |
| PRK1 (YIL095W)        | 0.979*        | -4.799            | AAK1                | 1.128        | 1.895         |
|                       |               |                   | BMP2K               | 0.935        | -1.585        |
| <b>GRR1 (YJR090C)</b> | <b>0.427</b>  | <b>-4.961</b>     | <b>FBXL15</b>       | <b>0.767</b> | <b>-4.961</b> |
|                       |               |                   | FBXL4               | 1.020        | 0.324         |
|                       |               |                   | LRRC29 (FBXL9)      | 1.329        | 5.559         |
|                       |               |                   | FBXL16              | 1.107        | 1.123         |
|                       |               |                   | FBXL14              | 1.002        | -0.019        |
| SKY1 (YMR216C)        | 0.748*        | -3.810            | SRPK1               | 1.030        | 0.358         |
|                       |               |                   | SRPK2               | 1.115        | 1.627         |
|                       |               |                   | SRPK2 (STK23)       | 1.288        | 4.232         |
| GSH2 (YOL049W)        | 0.991*        | -4.008            | GSS                 | 1.037        | 0.691         |
| PKH2 (YOL100W)        | 0.861*        | -5.039            | PDPK1               | 0.985        | -0.323        |

|                        |                    |                          |                     |                    |                |
|------------------------|--------------------|--------------------------|---------------------|--------------------|----------------|
| VPS16 (YPL045W)        | 0.958*             | -3.819                   | VPS16               | 1.003              | 0.045          |
|                        |                    |                          |                     |                    |                |
| <b>Yeast-haploid</b>   | <b>Fe levels</b>   |                          | <b>HeLa cells</b>   | <b>Fe levels</b>   |                |
| <b>name</b>            | <b>Fold change</b> | <b>Moderated z-score</b> | <b>name</b>         | <b>Fold change</b> | <b>z-score</b> |
| DNM1 (YLL001W)         | 0.973*             | -3.661                   | DNM1L               | 1.001              | 0.056          |
| HCA4 (YJL033W)         | NR                 | -4.287                   | DDX10               | 0.991              | -0.141         |
| MTR4 (YJL050W)         | NR                 | -3.608                   | SKIV2L2             | 0.940              | -1.045         |
|                        |                    |                          | DDX60/FLJ20035      | 1.046              | 1.363          |
|                        |                    |                          | DDX60L/FLJ31033     | 0.986              | -0.280         |
| <b>MET30 (YIL046W)</b> | <b>NR</b>          | <b>-4.450</b>            | FBXW11              | 1.004              | 0.141          |
|                        |                    |                          | FBXW7               | 0.926              | -2.273         |
|                        |                    |                          | <b>FBXW2</b>        | <b>0.887</b>       | <b>-3.510</b>  |
|                        |                    |                          | BTRC                | 1.106              | 3.347          |
| LST8 (YNL006W)         | 0.986*             | -3.570                   | MLST8/NM_02237<br>2 | 1.026              | 0.896          |
| CLA4 (YNL298W)         | 0.763*             | -3.818                   | LIMK1               | 0.990              | -0.310         |
|                        |                    |                          | LIMK2               | 0.996              | -0.158         |
|                        |                    |                          | TESK1               | 1.232              | 1.500          |
|                        |                    |                          | TESK2               | 1.092              | 0.780          |
| FUR1 (YHR128W)         | 1.159*             | -3.789                   | UPRT/MGC23937       | 1.126              | 2.644          |

\* outlier ICP-MS values were not included in the calculations; NR: non-reliable data due to wide range of values. Orthologs that result in similar effects on Cu or Fe ionomes in yeast and human cells are indicated in red.
